# Supplementary figures and images for: Study on the Collision Wear Characteristics of Particles on Moving Walls
Source: Research Square preprint supplement (doi:10.21203/rs.3.rs-8769899/v1), 2026-02-11

# Graphical Abstract


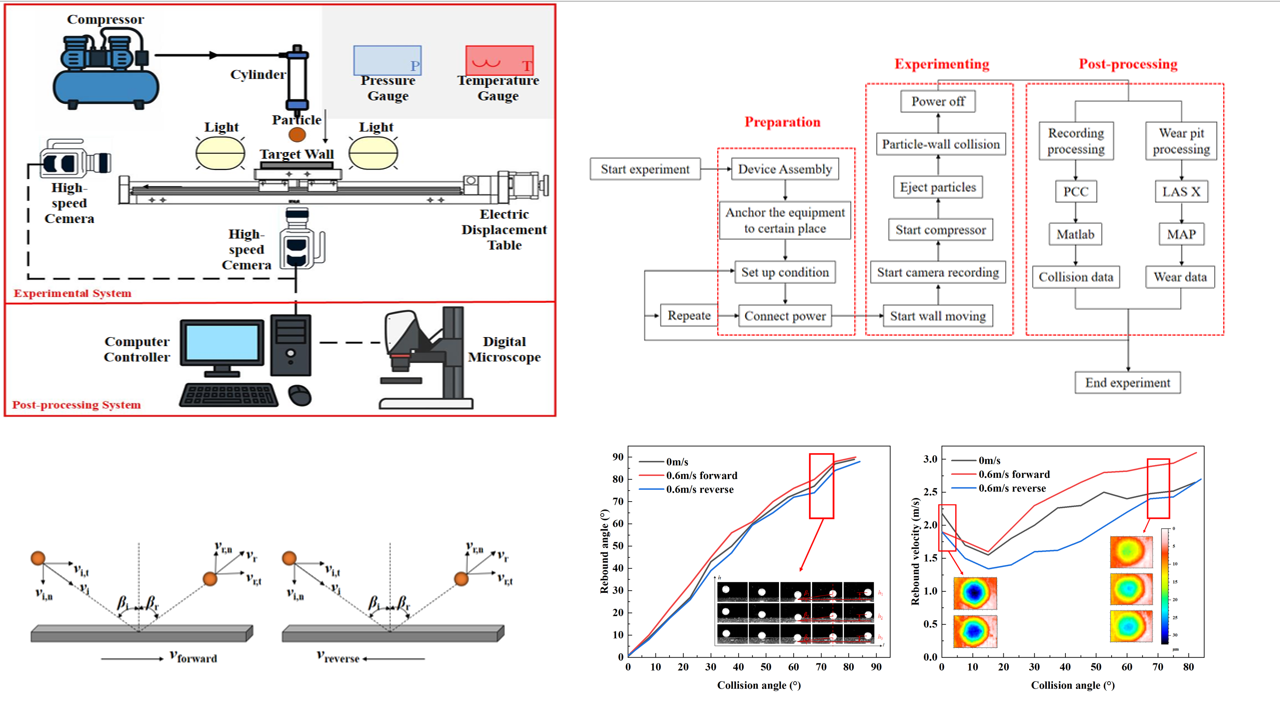

Supplement: Supplementary file 1 [file faa4f9a2cc6881d28d305783.docx]
